# Supplementary material for: Winnipeg on the Hudson
Source: MDPI journal article supplement (doi:10.3390/cancers13102458), 2003-01-01
Supplement: s1 [file s1]

# The Mutational Landscape of Acute Myeloid Leukaemia Predicts Responses and Outcomes in Elderly Patients from the PETHEMA-FLUGAZA Phase 3 Clinical Trial

Rosa Ayala, Inmaculada Rapado, Esther Onecha, David Martínez-Cuadrón, Gonzalo Carreño-Tarragona, Juan Miguel Bergua, Susana Vives, Jesus Lorenzo Algarra, Mar Tormo, Pilar Martínez<sup>0</sup>, Josefina Serrano<sup>1</sup>, Pilar Herrera, Fernando Ramos, Olga Salameo, Esperanza Lavilla, Cristina Gil, Jose Luis Lopez-Lorenzo, María Belén Vidriales, Jorge Labrador, Jose Francisco Falantes, María José Sayas, Bruno Paiva, Eva Barragán, Felipe Prosper, Miguel Ángel Sanz, Joaquín Martínez-López and Pau Montesinos and on behalf of the Programa para el Estudio de la Terapéutica en Hemopatías Malignas (PETHEMA) Cooperative Study Group

## FLUGAZA Clinical Trial (PETHEMA)

### *Patients*

Two-hundred and eighty-three patients aged over 65 with newly-diagnosed acute myeloid leukemia (AML; excluding those with acute promyelocytic leukemia according to World Health Organization criteria 1) and with an Eastern Cooperative Oncology Group PS (ECOG PS)  $<4$ , were enrolled in the PETHEMA phase 3 FLUGAZA clinical trial (NCT02319135). Exclusion criteria included prior treatment with hypomethylating agents or standard chemotherapy for AML secondary to myelodysplastic syndrome or myeloproliferative neoplasms, inadequate renal and hepatic function unless attributable to AML, and presence of other major coexisting illnesses (except *in situ* carcinoma or concomitant malignancy in complete remission [CR] for more than one year). All patients provided written informed consent. The trial was approved by appropriate institutional review boards or ethics committees at all sites before initiation and was conducted according to the tenets of the Declaration of Helsinki and the Harmonization E6 Guidelines for Good Clinical Practice.

### *Treatment.*

Patients were randomized 1:1 to receive open-label treatment with azacytidine or with low-dose cytarabine plus fludarabine (FLUGA). The induction phase consisted of three cycles. Patients in the experimental arm received subcutaneous (s.c.) azacytidine in standard doses ( $75 \text{ mg/m}^2$ ) on days 1 to 7 of each cycle (5-2-2 administration was allowed). Concomitant oral hydroxycarbamide ( $0.5\text{--}1 \text{ g}$  every 8 hours) was administered in addition to azacytidine when white blood cell (WBC) counts were between  $15\text{--}50 \times 10^9/\text{L}$  until leukocytes decreased to  $<15 \times 10^9/\text{L}$ . Patients assigned to the azacytidine arm with  $\text{WBC} >50 \times 10^9/\text{L}$  received the FLUGA scheme instead of azacytidine in cycle 1. Patients in the FLUGA arm received cytarabine ( $75 \text{ mg/m}^2$ ) by s.c. administration or 6-hour intravenous (i.v.) perfusion when they were outpatients or hospitalized, respectively, together with fludarabine, either oral at  $40 \text{ mg/m}^2$  if an outpatient or i.v. at  $25 \text{ mg/m}^2$  if hospitalized, on days 2 to 6 (days 2 to 5 when they were  $\geq 75$  years old). Patients in this arm also received s.c. filgrastim (granulocyte-colony stimulating factor;  $5 \text{ } \mu\text{g/kg}$ ) on days 1-3 except when WBC were  $>25 \times 10^9/\text{L}$ . Cycles were repeated every 28 days. Criteria to receive treatment as an inpatient included  $\text{WBC} >25 \times 10^9/\text{L}$ , high risk of tumor lysis syndrome coagulopathy or other serious uncontrolled complication. Patients in CR, complete remission with incomplete blood count recovery (CRi), partial remission (PR), hematology improvement or stable disease after the induction phase continued with the consolidation phase, which consisted of six cycles that also lasted for 28 days. In the experimental arm, the dose route and days of administration of azacytidine were the same as those used in the induction

phase. In the FLUGA arm, daily doses and routes of administration of FLUGA were the same as those used during induction, but drugs were given only on days 1 and 2 of every cycle (mini-FLUGA). All patients could receive supportive care (transfusions, antimicrobial and antifungal agents) as per institutional standard practice. An allogeneic hematopoietic stem cell transplant was not indicated as part of the front-line strategy in this clinical trial.

At the end of the ninth cycle, patients in CR/CRi had bone marrow aspirates for assessment of measurable residual disease (MRD). Those with MRD levels  $\geq 0.01\%$  continued treatment (azacytidine or mini-FLUGA) until relapse or progressive disease was documented. Patients whose MRD levels were  $< 0.01\%$  suspended treatment and entered the follow-up phase.

### Supplemental Methods.

Mutational profile workflow and filtering and classification of variants was performed as previously published (Onecha E. Haematologica 2020)

Patients were evaluated for mutations in *NPM1* and *FLT3* by methods other than next generation sequencing (NGS) (PCR and GeneScan, respectively). We used a separate script and detected the *FLT3*-ITD mutation by NGS. Although this panel was not designed to detect large InDels, we only missed 5 cases in the series who were positive using GeneScan analysis and these cases were considered as positive *FLT3*-ITD.

Custom NGS panel which included 43 genes implicated in myeloid pathology outlined below.

| GENE           | CHR | START     | END       | COVERAGE (%) |
|----------------|-----|-----------|-----------|--------------|
| <i>ASXL1</i>   | 20  | 30954122  | 31025231  | 98.59        |
| <i>BCOR</i>    | X   | 39911228  | 39937243  | 100          |
| <i>BCORL1</i>  | X   | 129139130 | 129190192 | 97.03        |
| <i>CALR</i>    | 19  | 13049460  | 13054786  | 100          |
| <i>CBL</i>     | 11  | 119077080 | 119170509 | 96.95        |
| <i>CEBPA</i>   | 19  | 33792147  | 33793455  | 97.57        |
| <i>CSF3R</i>   | 1   | 36931652  | 36945167  | 100          |
| <i>DNMT3A</i>  | 2   | 25457047  | 25536929  | 96.81        |
| <i>EGLN1</i>   | 1   | 231502062 | 231557733 | 89.26        |
| <i>EPAS1</i>   | 2   | 46525036  | 46611847  | 95.38        |
| <i>EPOR</i>    | 19  | 11488599  | 11495008  | 93.96        |
| <i>ETV6</i>    | 12  | 11802967  | 12044078  | 100          |
| <i>EZH2</i>    | 7   | 148504657 | 148544423 | 100          |
| <i>FLT3</i>    | 13  | 28578144  | 28644795  | 98.36        |
| <i>IDH1</i>    | 2   | 209101731 | 209116356 | 100          |
| <i>IDH2</i>    | 15  | 90627367  | 90635017  | 84.96        |
| <i>JAK2</i>    | 9   | 5021946   | 5126835   | 100          |
| <i>KDM6A</i>   | X   | 44732709  | 44970753  | 99.01        |
| <i>KIT</i>     | 4   | 55524176  | 55604767  | 100          |
| <i>KMT2A</i>   | 11  | 118307241 | 118393002 | 97.7         |
| <i>KRAS</i>    | 12  | 25362705  | 25398385  | 100          |
| <i>MPL</i>     | 1   | 43803488  | 43818462  | 99.26        |
| <i>NF1</i>     | 17  | 29422227  | 29701206  | 99.66        |
| <i>NPM1</i>    | 5   | 170814868 | 170837656 | 95.27        |
| <i>NRAS</i>    | 1   | 115251106 | 115258821 | 100          |
| <i>PHF6</i>    | X   | 133511597 | 133559416 | 89.4         |
| <i>PRPF40B</i> | 12  | 50017325  | 50038043  | 99.18        |
| <i>RAD21</i>   | 8   | 117859710 | 117878977 | 100          |
| <i>RUNX1</i>   | 21  | 36164287  | 36421263  | 98.42        |
| <i>SETBP1</i>  | 18  | 42281301  | 42643812  | 100          |
| <i>SF3A1</i>   | 22  | 30730553  | 30752861  | 100          |
| <i>SF3B1</i>   | 2   | 198256921 | 198299857 | 98.87        |

|              |    |           |           |       |
|--------------|----|-----------|-----------|-------|
| <i>SH2B3</i> | 12 | 111855923 | 111886159 | 88.57 |
| <i>SMC1A</i> | X  | 53406965  | 53449648  | 98.28 |
| <i>SRSF2</i> | 17 | 74732208  | 74733436  | 100   |
| <i>STAG2</i> | X  | 123156407 | 123234509 | 100   |
| <i>TET2</i>  | 4  | 106154899 | 106197684 | 100   |
| <i>THPO</i>  | 3  | 184090090 | 184096202 | 100   |
| <i>TP53</i>  | 17 | 7572852   | 7579966   | 94.5  |
| <i>U2AF1</i> | 21 | 44513191  | 44527685  | 98.86 |
| <i>VHL</i>   | 3  | 10183360  | 10191667  | 96.58 |
| <i>WT1</i>   | 11 | 32410545  | 32456973  | 91.46 |
| <i>ZRSR2</i> | X  | 15808512  | 15841397  | 100   |

**Table S1.** Patient characteristics.

| Variables           |                                                   | NGS study (N = 207)           |
|---------------------|---------------------------------------------------|-------------------------------|
| Age at diagnosis    | Years. median (range)                             | 75 (65–90)                    |
| Blasts at diagnosis | %. median                                         | 53                            |
| WBC at diagnosis    | $\times 10^{-9}/L$ . median (range)               | 6.7 (0.56–235)                |
| Dyserythropoiesis   | n. cases. %                                       | 92 (44%)                      |
| Dysmyelopoiesis     | n. cases. %                                       | 80 (39%)                      |
| Dysthrombopoiesis   | n. cases. %                                       | 54 (26%)                      |
|                     | de novo                                           | 116 (56%)                     |
| AML origin          | AML secondary MDS                                 | 92 (44%)                      |
|                     | AML secondary treatment                           | 16 (8%)                       |
| FAB classification  | M0/M1/M2/M4/M5/M6/M7/NOS                          | 32/ 36/ 35/ 1/ 43/ 24/ 10/ 19 |
| Cytogenetics        | Abnormal karyotype                                | 97 (47%)                      |
| Cytogenetics Risk   | Low                                               | 16                            |
| Group               | Intermediate                                      | 84                            |
| (ELN criteria)      | High                                              | 97                            |
|                     | AML with certain recurrent genetic abnormalities  | 18                            |
| WHO classification  | AML with myelodysplastic-related changes          | 92                            |
|                     | AML related to previous chemotherapy or radiation | 16                            |
|                     | AML NOS                                           | 80                            |
| Induction treatment | AZA                                               | 96                            |
|                     | LDAC (FLUGA)                                      | 111                           |
| 3rd cycle response  | CR                                                | 54 (26%)                      |
|                     | PR                                                | 21 (10%)                      |
| Progression cases   |                                                   | 131 (63%)                     |
| Death cases         |                                                   | 167(81%)                      |

Table represents the clinical data of patients included in the FLUGAZA clinical trial with an NGS gene panel study at diagnosis. WBC = white blood cells. AML = acute myeloid leukemia. AZA = azacitidine. ELN = European leukemiaNet (2017). MDS = myelodysplastic syndromes. FAB= French-American-British. NOS = not otherwise specified. LDAC (FLUGA) = low-dose cytarabine plus fludarabine. CR = complete remission and PR = partial remission. Clinical data were collected from the FLUGAZA trial (NCT02319135).

**Table S2.** Comparison of clinical and biological characteristics of the 207 patients who were included in this study and 78 not included. The number of partial responses in the 78 cases without molecular evaluation is in agreement with that obtained in the population included in this study in function of treatment received.

| <i>Variable</i>                |                                                         | <b>AZA-Arm<br/>(N = 96)</b> | <b>FLUGA-Arm (N<br/>= 111)</b> | <b>Patients<br/>Excluded<br/>(N = 78)<br/>AZA-arm = 47<br/>FLUGA-arm<br/>= 32</b> | <b>p-Value</b>   |
|--------------------------------|---------------------------------------------------------|-----------------------------|--------------------------------|-----------------------------------------------------------------------------------|------------------|
| Age at diagnosis               | Years. media                                            | 75                          | 76                             | 76                                                                                | <i>p</i> = NS    |
| Blasts at diagnosis            | %. media                                                | 55                          | 53                             | 47                                                                                | <i>p</i> = NS    |
| WBC at diagnosis               | x10 <sup>9</sup> /L. media                              | 22                          | 21                             | 19                                                                                | <i>p</i> = NS    |
| Dyserythropoiesis              | n cases                                                 | 45                          | 47                             | 28                                                                                | <i>p</i> = NS    |
| Dysmyelopoiesis                | n cases                                                 | 38                          | 42                             | 32                                                                                | <i>p</i> = NS    |
| Dysthrombopoiesis              | n cases                                                 | 23                          | 31                             | 18                                                                                | <i>p</i> = NS    |
|                                | de novo                                                 | 44                          | 55                             | 47                                                                                | <i>p</i> = NS    |
| AML origin                     | AML secondary                                           | 47                          | 45                             | 30                                                                                | <i>p</i> = NS    |
|                                | MDS                                                     |                             |                                |                                                                                   |                  |
|                                | AML secondary                                           | 5                           | 11                             | 1                                                                                 | <i>p</i> = NS    |
| FAB classification             | M0/M1/M2/M4/M5/                                         | 16/15/13/1/21/              | 16/21/22/0/22/                 | 6/11/13/10/1                                                                      | <i>p</i> = NS    |
|                                | M6/M7/NOS                                               | 12/5/9                      | 12/5/10                        | 0/4/16                                                                            |                  |
|                                | Abnormal                                                |                             |                                |                                                                                   |                  |
| Cytogenetics                   | Karyotype/Normal                                        | 46/ 38                      | 51/26                          | 37/ 29                                                                            | <i>p</i> = NS    |
|                                | Karyotype                                               |                             |                                |                                                                                   |                  |
| Cytogenetics Risk<br>Group     | Low-Intermedite                                         | 63                          | 68                             | 50                                                                                | <i>p</i> = NS    |
|                                | High Risk                                               | 30                          | 35                             | 23                                                                                |                  |
|                                | AML with certain                                        |                             |                                |                                                                                   |                  |
|                                | genetic                                                 | 5                           | 13                             | 2                                                                                 | <i>p</i> = NS    |
|                                | abnormalities                                           |                             |                                |                                                                                   |                  |
|                                | AML with                                                |                             |                                |                                                                                   |                  |
| WHO classification             | myelodisplastic-<br>related changes                     | 47                          | 45                             | 30                                                                                |                  |
|                                | AML related to<br>chemotherapy or<br>radiation previous | 5                           | 11                             | 1                                                                                 |                  |
|                                | AML NOS                                                 | 38                          | 42                             | 46                                                                                |                  |
| Follow-up time                 | Months. median                                          | 9.6                         | 7.8                            |                                                                                   | <i>p</i> = NS    |
|                                | CR                                                      | 23                          | 31                             | 15                                                                                | <i>p</i> = NS    |
| 3 <sup>rd</sup> cycle response | Cri                                                     | 14                          | 18                             | 26                                                                                | <i>p</i> = NS    |
|                                | PR                                                      | 16                          | 5                              | 11                                                                                | <i>p</i> = 0.004 |
| Final response                 | CR                                                      | 26                          | 31                             | 16                                                                                | <i>p</i> = NS    |
| Death cases                    |                                                         | 73                          | 94                             | 55                                                                                | <i>p</i> = NS    |

**Table S3.** Logistic regression analysis. Response defined as CR after 3<sup>rd</sup> cycle in the global series in function of characteristics of patients with AML on the treatment arm. Responder patients were defined as patients who achieved CR or CRi after 3<sup>rd</sup> cycle. AZA = azacitidine. FLUGA = fludarabine plus low-dose cytarabine (LDAC). OR = odds ratio. CI = confidence interval. Cytogenetic Risk Group (Low-Intermediate/High-Risk, classification ELN 2017). The multivariate analyses showed that no variable was associated with achieving a CR after bonferroni adjustment.

| Parameter                                  | <i>p</i> Value | OR           | 95% CI for OR |              |
|--------------------------------------------|----------------|--------------|---------------|--------------|
|                                            |                |              | Lower         | Upper        |
| AZA vs FLUGA-arm                           | 0.438          | 1.398        | 0.599         | 3.265        |
| Median age. years                          | <b>0.037</b>   | <b>0.916</b> | <b>0.843</b>  | <b>0.995</b> |
| Cytogenetic (Low-Intermediate / High Risk) | 0.626          | 1.320        | 0.433         | 4.029        |
| Mutated <i>ASXL1</i> (Yes/No)              | 0.779          | 0.837        | 0.242         | 2.897        |
| Mutated <i>BCOR</i> (Yes/ No)              | 0.525          | 0.484        | 0.051         | 4.553        |
| Mutated <i>BCORL1</i> (Yes/ No)            | 0.758          | 1.369        | 0.186         | 10.10        |
| Mutated <i>CALR</i> (Yes/ No)              | 0.999          | 0            | 0             | .            |
| Mutated <i>CBL</i> (Yes/ No)               | 0.996          | 1.008        | 0.048         | 21.208       |
| Mutated <i>CEBPA</i> by NGS (Yes/ No)      | 0.615          | 0.606        | 0.086         | 4.263        |
| Mutated <i>DNMT3A</i> (Yes/ No)            | 0.422          | 0.614        | 0.186         | 2.023        |
| Mutated <i>EPAS1</i> (Yes/ No)             | 0.268          | 0.201        | 0.012         | 3.431        |
| Mutated <i>EPOR</i> (Yes/ No)              | 0.294          | 6.317        | 0.202         | 197.69       |
| Mutated <i>ETV6</i> (Yes/ No)              | 0.175          | 0.211        | 0.022         | 1.999        |
| Mutated <i>EZH2</i> (Yes/ No)              | 0.130          | 4.425        | 0.646         | 30.30        |
| Mutated <i>FLT3</i> (Yes/ No)              | 0.815          | 1.143        | 0.375         | 3.482        |
| Mutated <i>IDH1</i> (Yes/ No)              | 0.914          | 1.079        | 0.273         | 4.255        |
| Mutated <i>IDH2</i> (Yes/ No)              | 0.488          | 0.631        | 0.172         | 2.317        |
| Mutated <i>JAK2</i> (Yes/ No)              | 0.573          | 0.647        | 0.143         | 2.935        |
| Mutated <i>KDM6A</i> (Yes/ No)             | 0.088          | 0.026        | 0             | 1.722        |
| Mutated <i>KIT</i> (Yes/ No)               | 0.900          | 1.140        | 0.148         | 8.79         |
| Mutated <i>KMT2A</i> (Yes/ No)             | <b>0.006</b>   | <b>6.684</b> | <b>1.732</b>  | <b>25.79</b> |
| Mutated <i>KRAS</i> (Yes/ No)              | 0.561          | 1.911        | 0.215         | 16.97        |
| Mutated <i>MPL</i> (Yes/ No)               | 0.890          | 1.273        | 0.042         | 38.97        |
| Mutated <i>NF1</i> (Yes/ No)               | <b>0.005</b>   | <b>9.013</b> | <b>1.927</b>  | <b>42.15</b> |
| Mutated <i>NPM1</i> by NGS (Yes/ No)       | 0.130          | 2.933        | 0.729         | 11.80        |
| Mutated <i>NRAS</i> (Yes/ No)              | <b>0.021</b>   | <b>0.043</b> | <b>0.003</b>  | <b>0.623</b> |
| Mutated <i>PHF6</i> (Yes/ No)              | <b>0.014</b>   | <b>7.935</b> | <b>1.514</b>  | <b>41.59</b> |
| Mutated <i>PRPF40B</i> (Yes/ No)           | 0.523          | 2.582        | 0.141         | 47.33        |
| Mutated <i>RAD21</i> (Yes/ No)             | 0.851          | 1.330        | 0.067         | 26.33        |
| Mutated <i>RUNX1</i> (Yes/ No)             | 0.969          | 0.977        | 0.299         | 3.195        |
| Mutated <i>SETBP1</i> (Yes/ No)            | 0.652          | 0.631        | 0.085         | 4.681        |
| Mutated <i>SF3A1</i> (Yes/ No)             | 0.670          | 2.090        | 0.07          | 62.14        |
| Mutated <i>SF3B1</i> (Yes/ No)             | 0.236          | 2.380        | 0.567         | 10           |
| Mutated <i>SH2B3</i> (Yes/ No)             | 0.794          | 1.416        | 0.104         | 19.29        |
| Mutated <i>SRSF2</i> (Yes/ No)             | 0.637          | 1.332        | 0.405         | 4.378        |
| Mutated <i>STAG2</i> (Yes/ No)             | 0.640          | 1.480        | 0.286         | 7.664        |
| Mutated <i>TET2</i> (Yes/ No)              | 0.944          | 1.036        | 0.383         | 2.807        |
| Mutated <i>TP53</i> (Yes/ No)              | <b>0.039</b>   | <b>0.179</b> | <b>0.035</b>  | <b>0.918</b> |
| Mutated <i>U2AF1</i> (Yes/ No)             | <b>0.040</b>   | <b>7.085</b> | <b>1.092</b>  | <b>45.97</b> |
| Mutated <i>VHL</i> (Yes/ No)               | 0.134          | 10.09        | 0.492         | 206.8        |
| Mutated <i>WT1</i> (Yes/ No)               | 0.175          | 0.189        | 0.017         | 2.095        |
| Mutated <i>ZRSR2</i> (Yes/ No)             | 0.942          | 1.058        | 0.228         | 4.904        |
| Score response predictor (no/ yes)         | 0.341          | 0.664        | 0.286         | 1.543        |
| Score High Risk (no/yes)                   | 0.814          | 1.200        | 0.263         | 5.468        |

**Table S4.** Logistic regression analysis. Response defined as overall response after 3<sup>rd</sup> cycle in the global series in function of characteristics of patients with AML on the treatment arm. Responder patients were defined as patients who achieved CR, CRi or PR (overall response) after 3<sup>rd</sup> cycle. AZA = azacitidine. FLUGA = fludarabine plus low-dose cytarabine (LDAC). OR = odds ratio. CI = confidence interval. Cytogenetic Risk Group (Low-Intermediate / High-Risk, classification ELN 2017). The multivariate analyses showed that no variable was associated with achieving a CR after bonferroni adjustment.

| Parameter                                | <i>p</i> Value | OR           | 95% CI for OR |              |
|------------------------------------------|----------------|--------------|---------------|--------------|
|                                          |                |              | Lower         | Upper        |
| Median age, years                        | 0.078          | 0.938        | 0.873         | 1.007        |
| Cytogenetic (Low-Intermediate/High Risk) | 0.241          | 0.624        | 0.284         | 1.373        |
| AZA vs FLUGA-arm                         | 0.928          | 1.047        | 0.388         | 2.827        |
| Mutated <i>ASXL1</i> (Yes/No)            | 0.639          | 0.765        | 0.25          | 2.339        |
| Mutated <i>BCOR</i> (Yes/ No)            | 0.252          | 0.322        | 0.046         | 2.237        |
| Mutated <i>BCORL1</i> (Yes/ No)          | 0.489          | 0.502        | 0.071         | 3.532        |
| Mutated <i>CALR</i> (Yes/ No)            | 0.999          | 0            | 0             |              |
| Mutated <i>CBL</i> (Yes/ No)             | 0.859          | 1.262        | 0.098         | 16.24        |
| Mutated <i>CEBPA</i> by NGS (Yes/ No)    | 0.206          | 0.33         | 0.059         | 1.843        |
| Mutated <i>DNMT3A</i> (Yes/ No)          | 0.379          | 0.62         | 0.214         | 1.799        |
| Mutated <i>EPAS1</i> (Yes/ No)           | 0.836          | 1.222        | 0.183         | 8.154        |
| Mutated <i>EPOR</i> (Yes/ No)            | 0.468          | 3.391        | 0.125         | 92.04        |
| Mutated <i>ETV6</i> (Yes/ No)            | 0.306          | 0.38         | 0.059         | 2.429        |
| Mutated <i>EZH2</i> (Yes/ No)            | 0.732          | 1.363        | 0.232         | 7.988        |
| Mutated <i>FLT3</i> (Yes/ No)            | 0.244          | 0.538        | 0.189         | 1.527        |
| Mutated <i>IDH1</i> (Yes/ No)            | 0.323          | 0.526        | 0.147         | 1.881        |
| Mutated <i>IDH2</i> (Yes/ No)            | 0.779          | 0.845        | 0.262         | 2.727        |
| Mutated <i>JAK2</i> (Yes/ No)            | 0.12           | 0.313        | 0.072         | 1.354        |
| Mutated <i>KDM6A</i> (Yes/ No)           | 0.206          | 0.109        | 0.004         | 3.367        |
| Mutated <i>KIT</i> (Yes/ No)             | 0.182          | 3.633        | 0.547         | 24.14        |
| Mutated <i>KMT2A</i> (Yes/ No)           | <b>0.025</b>   | <b>4.29</b>  | <b>1.204</b>  | <b>15.30</b> |
| Mutated <i>KRAS</i> (Yes/ No)            | 0.348          | 2.45         | 0.377         | 15.92        |
| Mutated <i>MPL</i> (Yes/ No)             | 0.827          | 0.692        | 0.026         | 18.69        |
| Mutated <i>NF1</i> (Yes/ No)             | 0.033          | 4.538        | 1.13          | 18.21        |
| Mutated <i>NPM1</i> by NGS (Yes/ No)     | 0.589          | 1.421        | 0.397         | 5.091        |
| Mutated <i>NRAS</i> (Yes/ No)            | <b>0.031</b>   | <b>0.136</b> | <b>0.022</b>  | <b>0.832</b> |
| Mutated <i>PHF6</i> (Yes/ No)            | 0.102          | 3.767        | 0.767         | 18.50        |
| Mutated <i>PRPF40B</i> (Yes/ No)         | 0.778          | 1.506        | 0.088         | 25.84        |
| Mutated <i>RAD21</i> (Yes/ No)           | 0.642          | 1.954        | 0.116         | 32.95        |
| Mutated <i>RUNX1</i> (Yes/ No)           | 0.929          | 1.051        | 0.35          | 3.159        |
| Mutated <i>SETBP1</i> (Yes/ No)          | 0.681          | 0.692        | 0.12          | 4.001        |
| Mutated <i>SF3A1</i> (Yes/ No)           | 0.399          | 4.261        | 0.147         | 123.6        |
| Mutated <i>SF3B1</i> (Yes/ No)           | 0.275          | 2.106        | 0.553         | 8.019        |
| Mutated <i>SH2B3</i> (Yes/ No)           | 0.705          | 1.614        | 0.136         | 19.18        |
| Mutated <i>SRSF2</i> (Yes/ No)           | 0.348          | 1.673        | 0.571         | 4.904        |
| Mutated <i>STAG2</i> (Yes/ No)           | 0.766          | 1.262        | 0.273         | 5.822        |
| Mutated <i>TET2</i> (Yes/ No)            | <b>0.070</b>   | <b>2.347</b> | <b>0.934</b>  | <b>5.9</b>   |
| Mutated <i>TP53</i> (Yes/ No)            | <b>0.018</b>   | <b>0.190</b> | <b>0.048</b>  | <b>0.756</b> |
| Mutated <i>U2AF1</i> (Yes/ No)           | 0.132          | 3.569        | 0.681         | 18.71        |
| Mutated <i>VHL</i> (Yes/ No)             | 0.141          | 8.857        | 0.484         | 161.9        |
| Mutated <i>WT1</i> (Yes/ No)             | 0.414          | 0.420        | 0.052         | 3.370        |
| Mutated <i>ZRSR2</i> (Yes/ No)           | 0.172          | 2.587        | 0.660         | 10.13        |
| Score response predictor (no/ yes)       | 0.471          | 0.704        | 0.271         | 1.828        |
| Score High Risk (no/yes)                 | 0.983          | 0.975        | 0.094         | 10.12        |

**Table S5.** Median OS in function mutant versus wild-type genes. Only genes mutated in  $\geq 4\%$  of patients were included in this table.

| Gene          | % Mutated Patients | AZA-Arm                      |                               | % Mutated Patients | FLUGA-Arm                    |                               |
|---------------|--------------------|------------------------------|-------------------------------|--------------------|------------------------------|-------------------------------|
|               |                    | wt Median OS Months (95% CI) | Mut Median OS Months (95% CI) |                    | wt Median OS Months (95% CI) | Mut Median OS Months (95% CI) |
| <i>ASXL1</i>  | 21.6               | 9 (2.3–15.7)                 | 12 (0.4–23.6)                 | 21.4               | 4(2.6–5.4)                   | 7(0–14.8)                     |
| <i>BCOR</i>   | 4.1                | 11 (4.3–17.7)                | 7 (0–17.8)                    | 7.1                | 5 (3.0–6.9)                  | 3 (0–11.3)                    |
| <i>BCORL1</i> | 4.1                | 11(5.0–16.9)                 | 4 (NA)                        | 6.3                | 5 (2.9–7.1)                  | 4 (0–13.6)                    |
| <i>CEBPA</i>  | 6.2                | 11 (5.6–16.4)                | 3 (0–0.7)                     | 5.4                | 5 (3.0–6.9)                  | 3 (0–11.4)                    |
| <i>DNMT3A</i> | 22.7               | 11 (4.4–17.5)                | 9 (2.5–15.5)                  | 20.5               | 5 (2.4–7.6)                  | 4 (2.0–5.9)                   |
| <i>ETV6</i>   | 7.2                | 11 (4.5–17.5)                | 9 (3.9–14.1)                  | 5.4                | 5 (2.8–7.1)                  | 4 (1.8–6.1)                   |
| <i>EZH2</i>   | 9.3                | 7 (0.7–13.3)                 | 14 (6.5–21.5)                 | 8.0                | 5 (2.7–7.3)                  | 4 (0–8.6)                     |
| <i>FLT3</i>   | 25.8               | 11 (4.3–17.7)                | 10 (0–29.9)                   | 24.1               | 5 (2.9–7.0)                  | 3 (1.3–4.66)                  |
| <i>IDH1</i>   | 12.4               | 11 (4.8–17.2)                | 7 (0–20.4)                    | 19.6               | 4 (2.5–5.5)                  | 7 (2.4–11.6)                  |
| <i>IDH2</i>   | 16.5               | 10 (2.7–17.3)                | 12 (2.3–21.7)                 | 17.9               | 5 (3.4–6.5)                  | 6(2.1–9.9)                    |
| <i>JAK2</i>   | 8.2                | 11 (5.1–16.9)                | 1 (NA)                        | 7.1                | 5 (2.9–7.1)                  | 1 (0–6.5)                     |
| <i>KIT</i>    | 5.2                | 11 (4.5–17.5)                | 7 (0.6– 13.4)                 | 5.4                | 5 (3.0–6.9)                  | 3 (0–7.8)                     |
| <i>KMT2A</i>  | 11.3               | 9 (3.4–4.6)                  | 17 (0–35.4)                   | 7.1                | 5 (3.0–6.9)                  | 3 (0–12.7)                    |
| <i>KRAS</i>   | 6.2                | 11 (5.1–16.9)                | 1 (0–5.8)                     | 4.5                | 5 (3.0–6.9)                  | 2 (0–4.1)                     |
| <i>NF1</i>    | 13.4               | 12 (5.7–18.3)                | 4 (0–11.9)                    | 8.9                | 5 (2.9–7.1)                  | 4 (0–11.7)                    |
| <i>NPM1</i>   | 15.5               | 9 (2.6–15.4)                 | 16 (0.9–31.1)                 | 16.1               | 5 (2.8–7.1)                  | 5 (0–11.2)                    |
| <i>NRAS</i>   | 5.2                | 10 (4.4–15.6)                | 15 (0–38.6)                   | 16.1               | 6 (3.8–8.1)                  | 2 (0.6–3.4)                   |
| <i>PHF6</i>   | 6.2                | 10 (3.5–16.5)                | 12 (0–27.7)                   | 5.4                | 5 (2.9–7.1)                  | 4(0–13.6)                     |
| <i>RUNX1</i>  | 23.7               | 7 (0–14.0)                   | 15 (7.7–22.2)                 | 17.9               | 5 (3.0–6.9)                  | 3 (1.3–4.7)                   |
| <i>SETBP1</i> | 6.2                | 11 (5.1–16.8)                | 4 (NA)                        | 2.7                | 5 (2.9–7.0)                  | Not reached                   |
| <i>SF3B1</i>  | 8.2                | 9 (2.8–15.2)                 | 19 (9.6–28.4)                 | 6.3                | 5 (3.0–6.9)                  | 11 (0–34.1)                   |
| <i>SH2B3</i>  | 6.2                | 9 (1.5–16.5)                 | 11 (8.8–13.1)                 | 2.7                | 5 (2.8–7.1)                  | 11 (1.4–20.6)                 |
| <i>SRSF2</i>  | 22.7               | 11 (4.4–17.6)                | 7 (0–20.3)                    | 24.1               | 4 (2.8–5.2)                  | 11 (3.6–18.4)                 |
| <i>STAG2</i>  | 8.2                | 10 (3.8–16.2)                | 11 (0–26.4)                   | 10.7               | 5 (2.9–7.1)                  | 3 (0.7–5.2)                   |
| <i>TET2</i>   | 23.7               | 7 (0.1–13.9)                 | 14 (9.8–18.2)                 | 28.6               | 5 (2.6–7.4)                  | 4 (1.2–6.7)                   |
| <i>TP53</i>   | 22                 | 14 (10.9–17.0)               | 2 (0.4–3.5)                   | 19.6               | 7 (4.4–9.5)                  | 2 (0.9–3.1)                   |
| <i>U2AF1</i>  | 8                  | 7 (1.3–12.7)                 | 15 (8.3–21.7)                 | 7.1                | 5 (3.4–6.6)                  | 6 (1.8–10.1)                  |
| <i>WT1</i>    | 8                  | 11 (4.9–17.0)                | 4 (0–10.4)                    | 7.1                | 5 (2.9–7.1)                  | 3 (2.1–3.9)                   |
| <i>ZRSR2</i>  | 9                  | 7 (1.1–12.9)                 | 15 (8.5–21.5)                 | 8.0                | 5 (3.5–6.5)                  | 7 (0–18.7)                    |

OS = Overall Survival. Overall survival was calculated from diagnosis to the time of death from any cause. In the AZA-arm, the median OS was 10 months (range 4.4–15.6) for wt-*NRAS* versus 15 months (range 0–38.6) for mut-*NRAS*, whereas in the FLUGA-arm the median OS was 6 months (range 3.8–8.1) for wt-*NRAS* versus 2 months (range 0.6–3.4) for mut-*NRAS* ( $p = 0.013$ ). In the AZA-arm, the median OS was 14 months (range 10.9–17) for wt-*TP53* versus 2 months (range 0.4–3.7) for mut-*TP53*, whereas in the FLUGA-arm the median OS was 7 months (range 4.4–9.6) for wt-*TP53* versus 2 months (range 0.9–3.1) for mut-*TP53* ( $p < 0.001$ ). In addition, patients with mutated *SF3B1* showed a trend for better prognosis in both arms. In the AZA-arm, the median OS was 9 months (range 2.8–15.2) for wt-*SF3B1* versus 19 months (range 9.6–28.4) for mut-*SF3B1* ( $p = 0.081$ ), whereas in the FLUGA-arm the median OS was 5 months (range 3–6.9) for wt-*SF3B1* versus 11 months (range 0–34.1) for mut-*SF3B1* ( $p = 0.083$ ).

**Table S6.** Mutated genes in FLUGAZA clinical trial (AZA versus FLUGA).

| <b>Gene</b>    | <b>AZA-Arm (Cases)</b> | <b>AZA-Arm (%)</b> | <b>FLUGA-Arm (cases)</b> | <b>FLUGA-Arm (%)</b> |
|----------------|------------------------|--------------------|--------------------------|----------------------|
| <i>ASXL1</i>   | 21                     | 21.6               | 24                       | 21.4                 |
| <i>BCOR</i>    | 4                      | 4.1                | 8                        | 7.1                  |
| <i>BCORL1</i>  | 4                      | 4.1                | 7                        | 6.3                  |
| <i>CALR</i>    | 1                      | 1                  | 1                        | 0.9                  |
| <i>CBL</i>     | 2                      | 2.1                | 4                        | 3.6                  |
| <i>CEBPA</i>   | 6                      | 6.2                | 6                        | 5.4                  |
| <i>CSF3R</i>   | 0                      | 0                  | 0                        | 0                    |
| <i>DNMT3A</i>  | 22                     | 22.7               | 23                       | 20.5                 |
| <i>EGLN1</i>   | 0                      | 0                  | 0                        | 0                    |
| <i>EPAS1</i>   | 3                      | 3.1                | 7                        | 6.3                  |
| <i>EPOR</i>    | 1                      | 1                  | 4                        | 3.6                  |
| <i>ETV6</i>    | 7                      | 7.2                | 6                        | 5.4                  |
| <i>EZH2</i>    | 9                      | 9.3                | 9                        | 8                    |
| <i>FLT3</i>    | 25                     | 25.8               | 27                       | 24.1                 |
| <i>IDH1</i>    | 12                     | 12.4               | 22                       | 19.6                 |
| <i>IDH2</i>    | 16                     | 16.5               | 20                       | 17.9                 |
| <i>JAK2</i>    | 8                      | 8.2                | 8                        | 7.1                  |
| <i>KDM6A</i>   | 3                      | 3.1                | 3                        | 2.7                  |
| <i>KIT</i>     | 5                      | 5.2                | 6                        | 5.4                  |
| <i>KMT2A</i>   | 11                     | 11.3               | 8                        | 7.1                  |
| <i>KRAS</i>    | 6                      | 6.2                | 5                        | 4.5                  |
| <i>MPL</i>     | 2                      | 2.1                | 1                        | 0.9                  |
| <i>NF1</i>     | 13                     | 13.4               | 10                       | 8.9                  |
| <i>NPM1</i>    | 15                     | 15.5               | 18                       | 16.1                 |
| <i>NRAS</i>    | 5                      | 5.2                | 18                       | 16.1                 |
| <i>PHF6</i>    | 6                      | 6.2                | 6                        | 5.4                  |
| <i>PRPF40B</i> | 1                      | 1                  | 4                        | 3.6                  |
| <i>RAD21</i>   | 2                      | 2.1                | 2                        | 1.8                  |
| <i>RUNX1</i>   | 23                     | 23.7               | 20                       | 17.9                 |
| <i>SETBP1</i>  | 6                      | 6.2                | 3                        | 2.7                  |
| <i>SF3A1</i>   | 0                      | 0                  | 2                        | 1.8                  |
| <i>SF3B1</i>   | 8                      | 8.2                | 7                        | 6.3                  |
| <i>SH2B3</i>   | 6                      | 6.2                | 3                        | 2.7                  |
| <i>SMC1A</i>   | 1                      | 1                  | 2                        | 1.8                  |
| <i>SRSF2</i>   | 22                     | 22.7               | 27                       | 24.1                 |
| <i>STAG2</i>   | 8                      | 8.2                | 12                       | 10.7                 |
| <i>TET2</i>    | 23                     | 23.7               | 32                       | 28.6                 |
| <i>THPO</i>    | 1                      | 1                  | 0                        | 0                    |
| <i>TP53</i>    | 23                     | 22                 | 22                       | 19.6                 |
| <i>U2AF1</i>   | 7                      | 8                  | 8                        | 7.1                  |
| <i>VHL</i>     | 2                      | 2                  | 2                        | 1.8                  |
| <i>WT1</i>     | 3                      | 8                  | 8                        | 7.1                  |
| <i>ZRSR2</i>   | 8                      | 9                  | 9                        | 8                    |

Distribution of gene mutations in both arms of the clinical trial (AZA = azacitidine. FLUGA = fludarabine plus low-dose cytarabine (LDAC)). Number of cases and % with mutations in each arm.



**Table S7.** Univariate Cox regression analysis for OS and RFS.

| Variables                                  | HR          | Risk of death 95% |              |              | HR          | Risk of relapse |              | p-value      |
|--------------------------------------------|-------------|-------------------|--------------|--------------|-------------|-----------------|--------------|--------------|
|                                            |             | CI for HR         |              | p-value      |             | 95% CI for HR   |              |              |
|                                            |             | Lower             | Upper        |              |             |                 |              |              |
| Age, years                                 | 1.03        | 0.997             | 1.064        | 0.070        | 0.99        | 0.954           | 1.03         | 0.663        |
| Cytogenetic (Low-Intermediate / High Risk) | 1.23        | 0.756             | 2.006        | 0.404        | 0.92        | 0.530           | 1.583        | 0.754        |
| AZA vs FLUGA-arm                           | 1.26        | 0.854             | 1.847        | 0.245        | 1.61        | 1.034           | 2.495        | 0.034        |
| ASXL1                                      | 1.03        | 0.630             | 1.692        | 0.898        | 0.95        | 0.544           | 1.657        | 0.856        |
| BCOR                                       | 1.30        | 0.609             | 2.769        | 0.497        | <b>3.79</b> | <b>1.696</b>    | <b>8.442</b> | <b>0.001</b> |
| BCORL1                                     | 1.06        | 0.462             | 2.405        | 0.898        | 0.96        | 0.362           | 2.527        | 0.928        |
| CALR                                       | 0.51        | 0.042             | 6.142        | 0.595        | 12.9        | 2.014           | 82.967       | 0.006        |
| CBL                                        | 2.75        | 0.743             | 10.2         | 0.129        | 0.23        | 0.022           | 2.453        | 0.226        |
| CEBPA                                      | 1.95        | 0.884             | 4.29         | 0.097        | 2.12        | 0.871           | 5.161        | 0.097        |
| DNMT3A                                     | 1.46        | 0.915             | 2.325        | 0.112        | 1.42        | 0.784           | 2.565        | 0.247        |
| EPAS1                                      | 0.90        | 0.322             | 2.473        | 0.828        | 1.35        | 0.436           | 4.185        | 0.601        |
| EPOR                                       | 2.37        | 0.690             | 8.16         | 0.170        | 0.23        | 0.035           | 1.477        | 0.121        |
| ETV6                                       | 2.05        | 0.930             | 4.521        | 0.074        | 1.40        | 0.583           | 3.371        | 0.449        |
| EZH2                                       | 0.69        | 0.338             | 1.37         | 0.281        | 0.75        | 0.356           | 1.579        | 0.448        |
| FLT3                                       | 1.16        | 0.713             | 1.871        | 0.557        | 1.07        | 0.589           | 1.949        | 0.818        |
| IDH1                                       | 1.21        | 0.675             | 2.151        | 0.526        | 1.57        | 0.783           | 3.148        | 0.203        |
| IDH2                                       | 1.53        | 0.881             | 2.641        | 0.131        | 1.32        | 0.695           | 2.508        | 0.394        |
| JAK2                                       | 2.32        | 1.037             | 5.17         | 0.040        | 1.90        | 0.770           | 4.708        | 0.163        |
| KDM6A                                      | 2.60        | 0.854             | 7.903        | 0.092        | 0.76        | 0.150           | 3.873        | 0.744        |
| KIT                                        | 0.73        | 0.283             | 1.904        | 0.525        | 1.62        | 0.632           | 4.147        | 0.314        |
| KMT2A                                      | 0.65        | 0.332             | 1.267        | 0.205        | 1.09        | 0.527           | 2.258        | 0.813        |
| KRAS                                       | 1.05        | 0.427             | 2.589        | 0.912        | 0.38        | 0.108           | 1.309        | 0.124        |
| MPL                                        | 0.64        | 0.129             | 3.18         | 0.586        | 2.14        | 0.407           | 11.23        | 0.369        |
| NF1                                        | 1.41        | 0.726             | 2.753        | 0.308        | 1.55        | 0.736           | 3.247        | 0.249        |
| NPM1                                       | 0.81        | 0.411             | 1.602        | 0.547        | 0.49        | 0.219           | 1.11         | 0.087        |
| NRAS                                       | <b>2.09</b> | <b>1.191</b>      | <b>3.652</b> | <b>0.010</b> | 2.62        | 1.300           | 5.269        | 0.007        |
| PHF6                                       | 0.58        | 0.246             | 1.365        | 0.212        | 1.35        | 0.5345          | 3.401        | 0.526        |
| PRPF40B                                    | 1.45        | 0.360             | 5.858        | 0.598        | 0.45        | 0.047           | 4.391        | 0.496        |
| RAD21                                      | 0.89        | 0.228             | 3.461        | 0.866        | 2.97        | 0.673           | 13.119       | 0.150        |
| RUNX1                                      | 1.16        | 0.688             | 1.951        | 0.579        | 1.51        | 0.868           | 2.619        | 0.144        |
| SETBP1                                     | 0.63        | 0.208             | 1.887        | 0.406        | 0.99        | 0.347           | 2.87         | 0.998        |
| SF3A1                                      | 1.76        | 0.356             | 8.725        | 0.487        | 0.86        | 0.093           | 7.836        | 0.891        |
| SF3B1                                      | 0.64        | 0.339             | 1.214        | 0.172        | 0.77        | 0.364           | 1.619        | 0.488        |
| SH2B3                                      | 0.55        | 0.181             | 1.666        | 0.290        | 1.71        | 0.477           | 6.107        | 0.410        |
| SMC1A                                      | 1.24        | 0.315             | 4.895        | 0.756        | 0.91        | 0.156           | 5.282        | 0.915        |
| SRSF2                                      | 0.76        | 0.449             | 1.285        | 0.304        | 0.75        | 0.424           | 1.331        | 0.327        |
| STAG2                                      | 1.41        | 0.735             | 2.721        | 0.299        | 1.32        | 0.644           | 2.703        | 0.448        |
| TET2                                       | 1.29        | 0.838             | 1.98         | 0.246        | 1.68        | 1.020           | 2.757        | 0.041        |
| TP53                                       | <b>2.57</b> | <b>1.351</b>      | <b>4.872</b> | <b>0.004</b> | 1.90        | 0.822           | 4.374        | 0.133        |
| U2AF1                                      | 0.47        | 0.206             | 1.059        | 0.068        | 0.48        | 0.190           | 1.217        | 0.122        |
| VHL                                        | 0.35        | 0.042             | 2.892        | 0.329        | 2.62        | 0.659           | 10.411       | 0.171        |
| WT1                                        | 1.13        | 0.472             | 2.688        | 0.787        | 2.72        | 0.944           | 7.844        | 0.063        |
| ZRSR2                                      | 0.82        | 0.400             | 1.669        | 0.581        | 1.17        | 0.555           | 2.472        | 0.678        |

AZA = azacitidine. FLUGA = fludarabine plus low-dose cytarabine (LDAC). HR = hazard ratio. CI = confidence interval. Cytogenetic Risk Group (Low-Intermediate / High-Risk, classification ELN 2017).

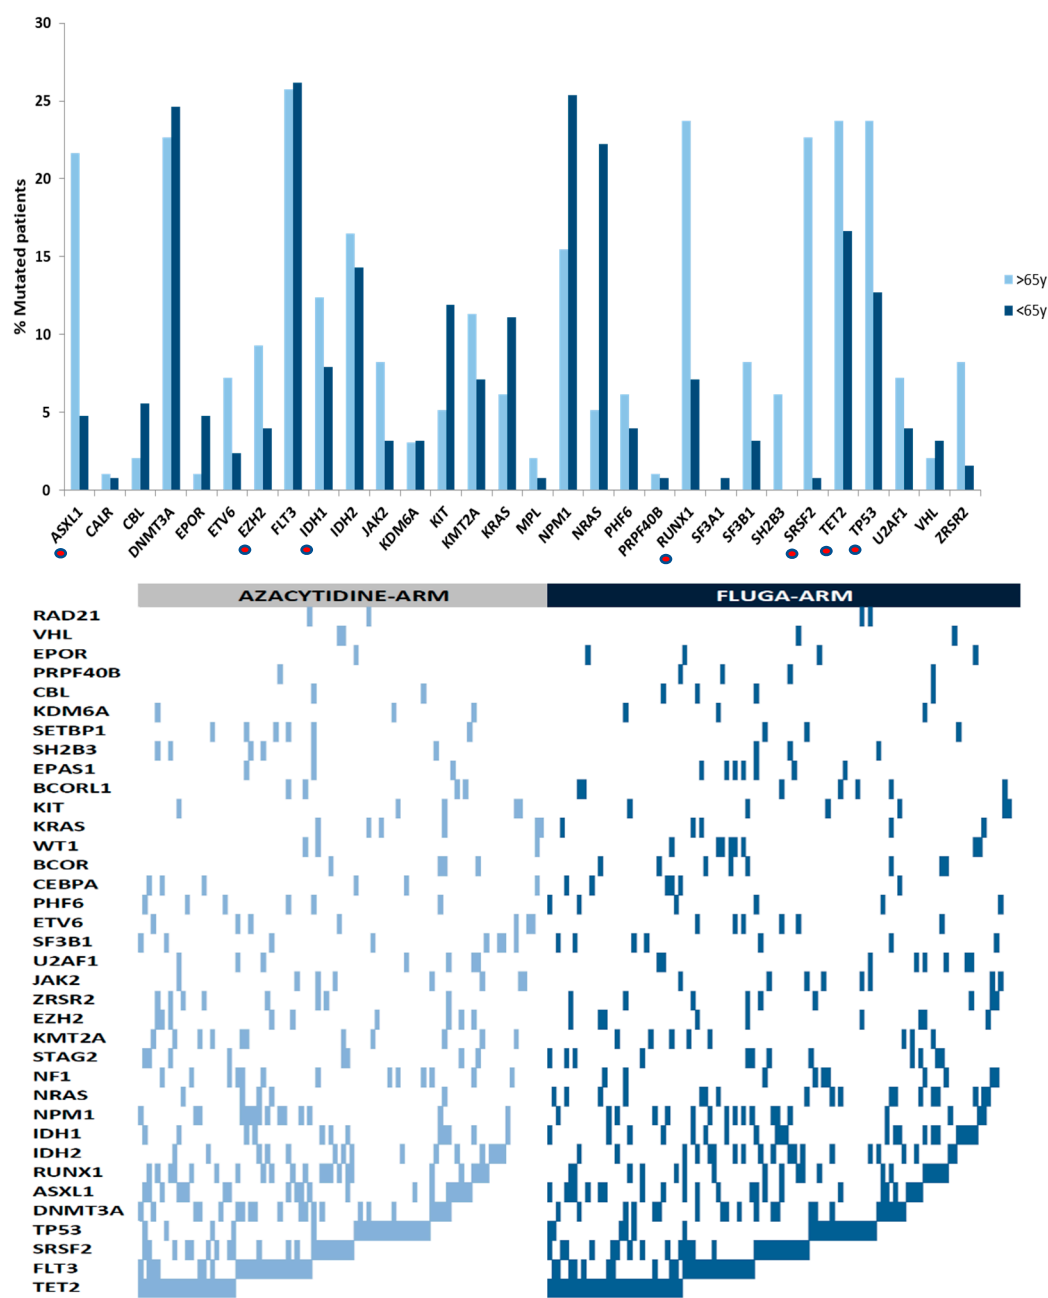

**Figure S1.** The landscape of mutated gene in elderly patients with AML is different to that of younger patients. **(A).** The mutational landscape described in the present study is different to that previously published for younger patients. We detected a higher number of patients with mutations in *ASXL1*, *EZH2*, *IDH1*, *RUNX1*, *SRSF2*, *TET2* and *TP53* in the elderly AML cohort versus our previously published younger AML cohort. **(B).** Distribution of mutations in both arms showing that *NRAS* mutations ( $p = 0.012$ ) are more frequent in patients randomized to the FLUGA-arm. By contrast, *TP53* mutation frequency distribution is homogeneous: 23.7% in AZA-arm and 19.6% in FLUGA-arm ( $p = \text{NS}$ ).

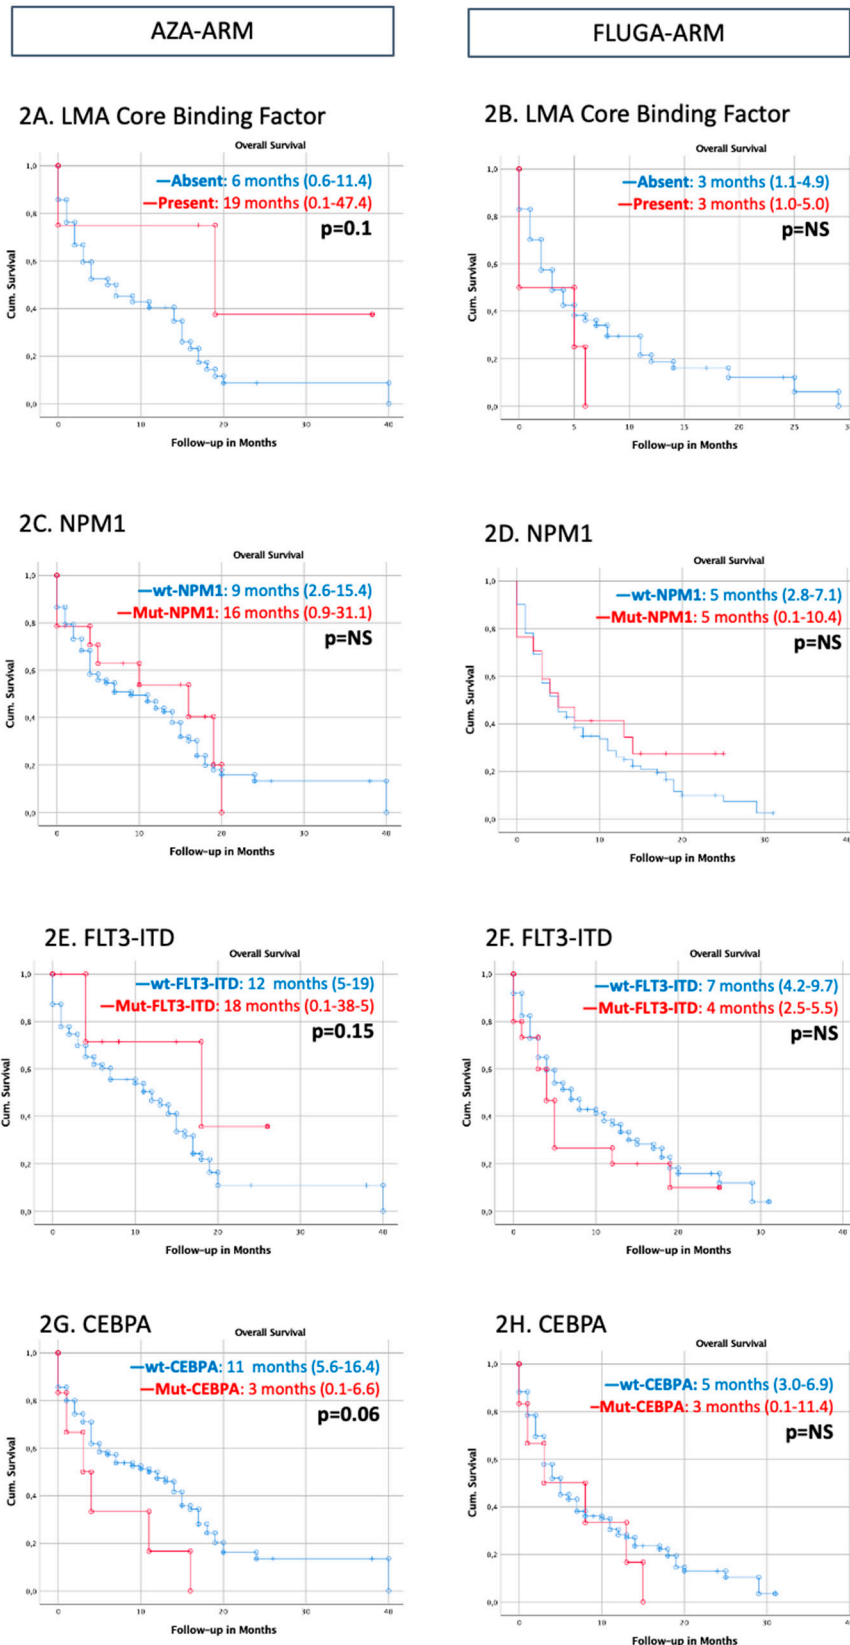

**Figure 2.** Kaplan-Meier analyses were performed to assess the association of conventional genomic aberrations with patient overall survival. No conventional molecular marker with prognostic impact on overall survival was detected. Recurrent genetic abnormalities group have no significant impact on overall survival (OS) in the AZA-arm (A) or the FLUGA-arm (B). *NPM1* or *FLT3-ITD* have no significant impact on OS in the AZA-arm (C,E. respectively) or the FLUGA-arm (D,F. respectively). *CEBPA* mutations showed a tendency for association with poor OS in the AZA-arm.

with a median OS of 11 months for *CEBPA* mutated (mut) versus 3 months for *CEBPA* wild type (wt);  $p = 0.06$  (G,H. respectively). Absence of marker or wild-type status is indicated in blue. presence of marker or mutated status is represented in red. AZA. azacytidine; FLUGA fludarabine plus low-dose cytarabine (LDAC)

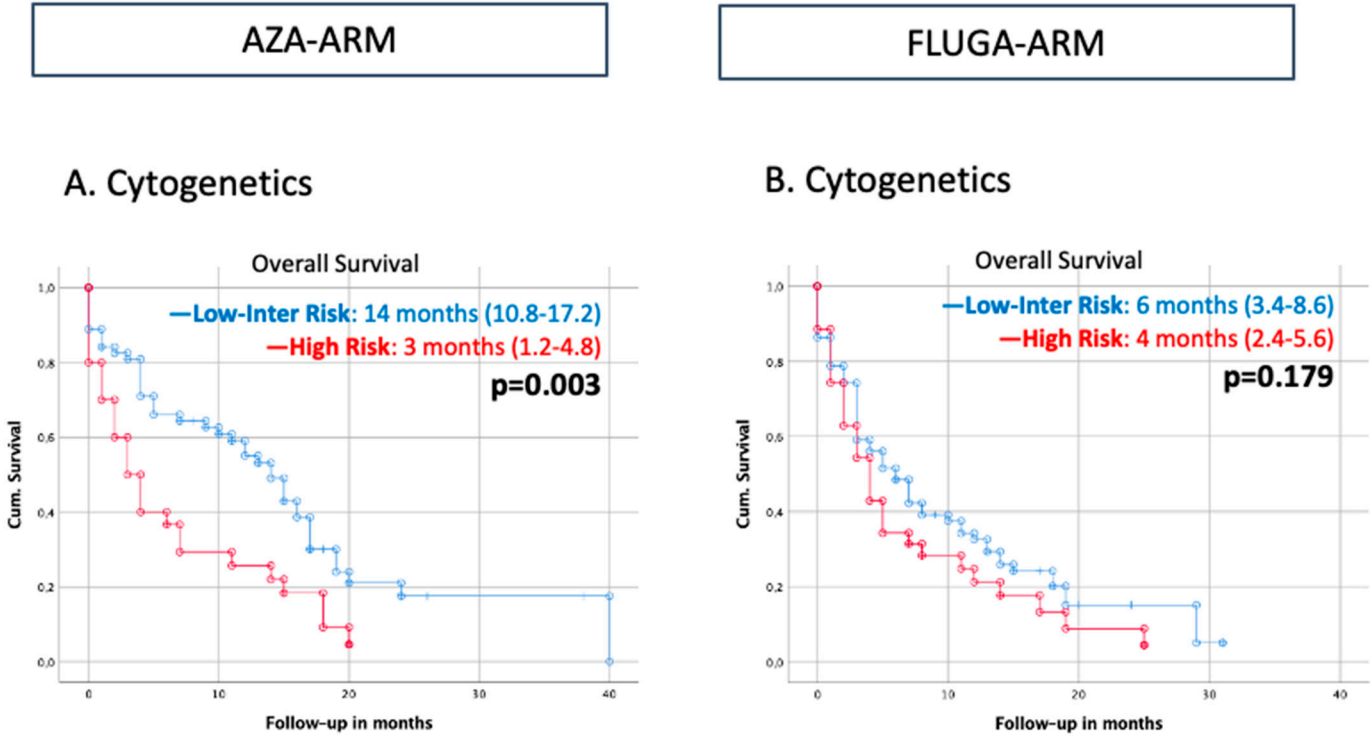

**Figure S3.** Kaplan-Meier analyses were performed to assess the association of conventional genomic aberrations with patient overall survival. Cytogenetic risk predicts overall survival in elderly patients with AML in AZA-arm. Graphs represent survival of the low-intermediate-risk group (blue) versus high-risk group in AZA-arm (A) and in FLUGA-arm (B). Patients with low-intermediate-risk clearly gained benefit from AZA (median overall survival was 14 months in AZA-arm vs 6 months in FLUGA-arm;  $p = 0.003$ ). AZA. azacytidine; FLUGA fludarabine plus low-dose cytarabine (LDAC).

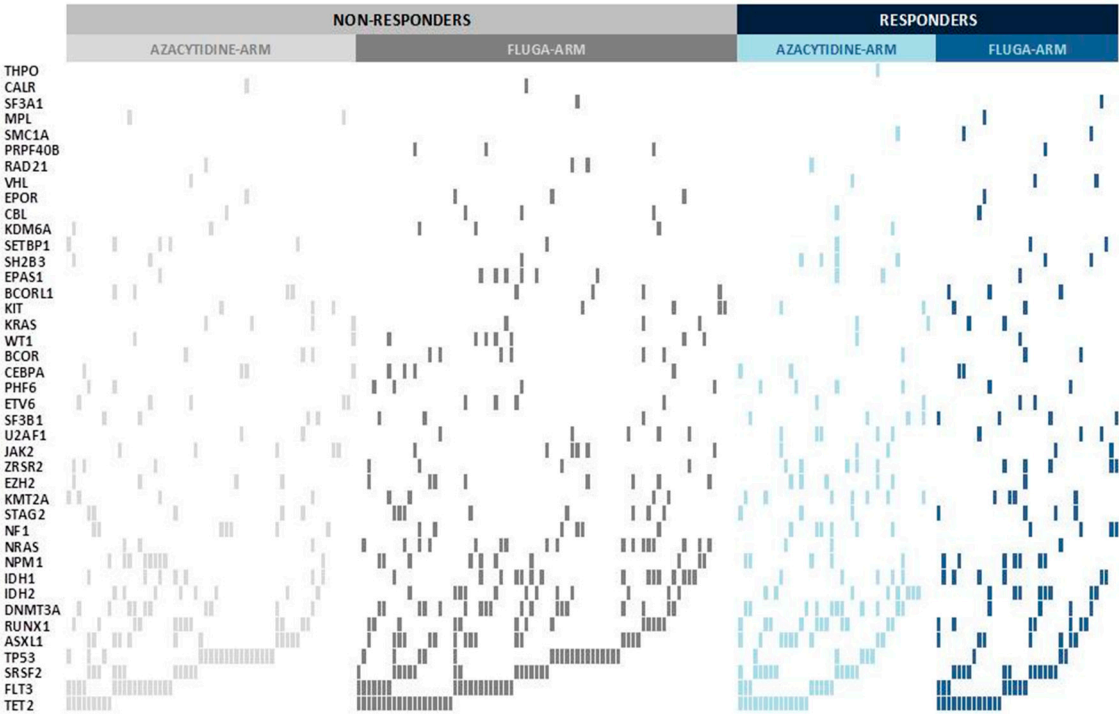

**Figure S4.** Mutational landscape in responders and non-responders in AZA-arm and FLUGA-arm after 3<sup>rd</sup> cycle. Each gene is represented by rows and the patients with mutations are shown in AZA-arm and FLUGA-arm and subdivided as responders and non-responders. Responders were defined as patients who achieve CR (complete remission) or CRi (complete remission with incomplete hematologic recovery). AZA = azacytidine; FLUGA = fludarabine plus low-dose cytarabine (LDAC).

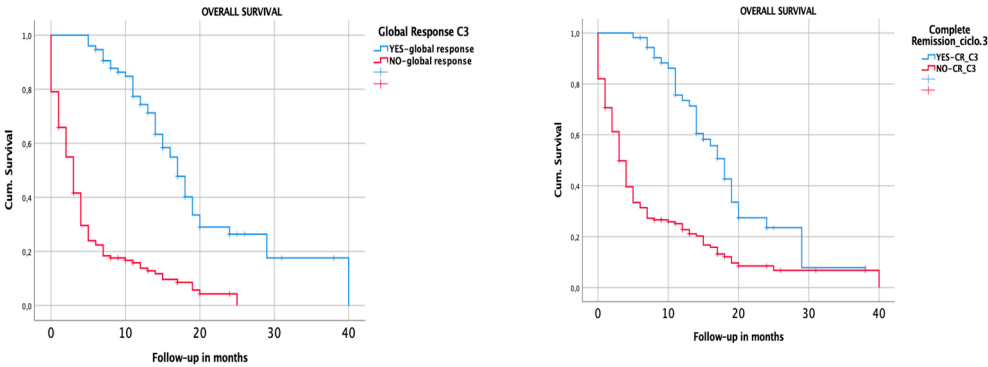

|                            | Sig.   | HR    | 95,0% CI for HR |       |
|----------------------------|--------|-------|-----------------|-------|
|                            |        |       | Lower           | Upper |
| Global Response Cycle 3    | <0,001 | 5,005 | 2,707           | 9,254 |
| Complete Remission Cycle 3 | 0,66   | 1,16  | 0,598           | 2,25  |

**Figure S5.** Achieving overall response after 3<sup>o</sup> cycle AZA or FLUGA is the main factor associated with increased Overall Survival.

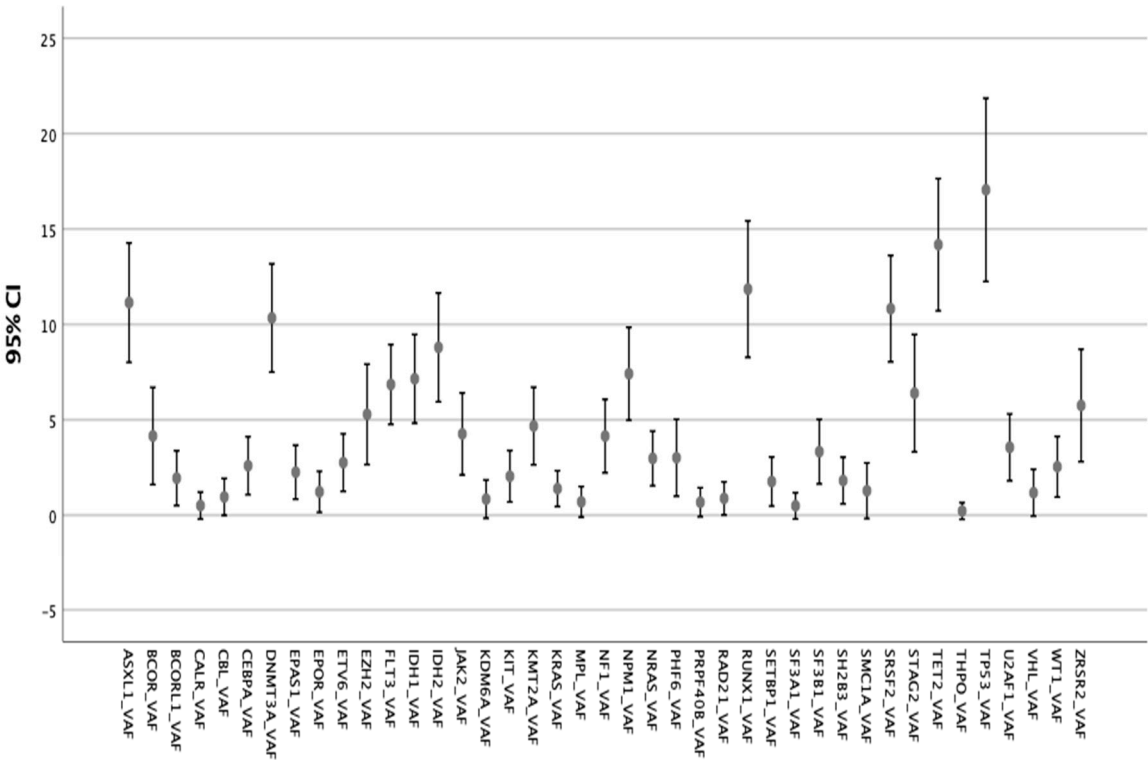

**Figure S6.** Variant allele frequency distribution by genes represented as median and 95% confidence interval. VAF (variant allele frequency) was defined as the percentage of sequence reads observed matching a specific DNA variant. divided by the overall coverage at that locus.

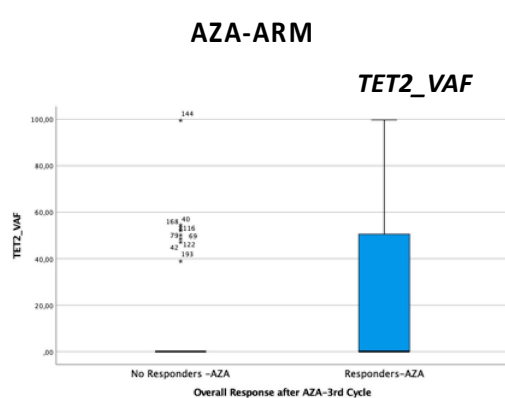

6A.

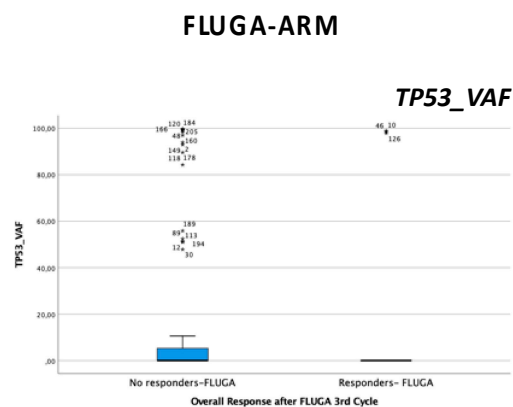

6C.

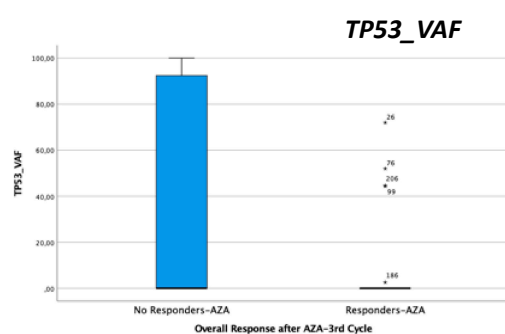

6B.

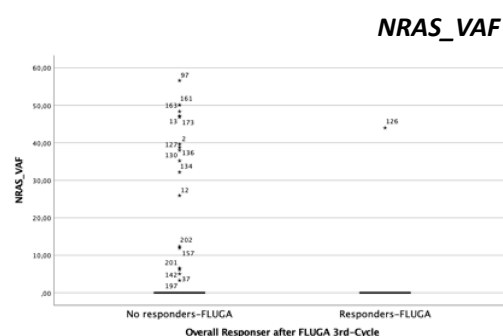

6D.

**Figure S7.** Differential distribution of variant allele frequency -gene mutations between responders and non-responders. VAF (variant allele frequency) was defined as the percentage of sequence reads observed matching a specific DNA variant, divided by the overall coverage at that locus. (A). Distribution of VAF-*TET2* in the AZA-arm is different between responders and non-responders: median 20.37 versus 8.7% ( $p = 0.022$ ). (B). The distribution of VAF-*TP53* in the AZA-arm is different between responders and non-responders: median 5.52 versus 27.3% ( $p = 0.015$ ). (C) The distribution of VAF-*NRAS* in the FLUGA-arm is different between responders and non-responders: median 1.22 versus 6.7% ( $p = 0.009$ ). (D) The distribution of VAF-*TP53* in the FLUGA-arm is different between responders and non-responders: median 8.2 versus 19.64% ( $p = 0.046$ ).
